# Supplementary material for: A Novel miRNA From Egg-Derived Exosomes of Schistosoma japonicum Promotes Liver Fibrosis in Murine Schistosomiasis
Source: PubMed Central journal article supplement (PMC9094574; doi:10.3389/fimmu.2022.860807), 2022-04-27
Supplement: DataSheet_1.pdf [file DataSheet_1.pdf]

*Supplementary Material*

**Supplementary Figures**

## Supplementary Figure

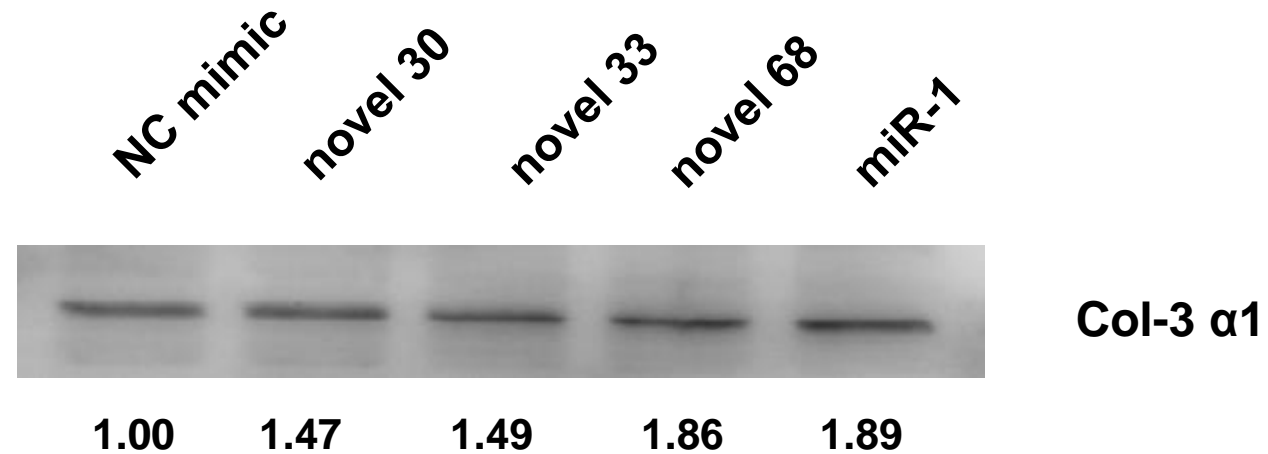

**Supplementary Figure S1. Novel miRNA-33 can upregulate the protein expression of Col 3 ( $\alpha$ 1) in LX-2 cells.** LX-2 cells were transfected for 48 hours with several novel miRNA mimics (novel miRNA-30, novel miRNA-33, novel miRNA-68, miR-1, and miRNA-NC), and the expression of Col 3 ( $\alpha$ 1) was determined by western blotting. Results of novel miRNA-30, novel miRNA-33, novel miRNA-68, and miR-1 group were compared with those of the miRNA-NC group. The abundances of Col 3 ( $\alpha$ 1) proteins were normalized against GAPDH.

## Supplementary Figure

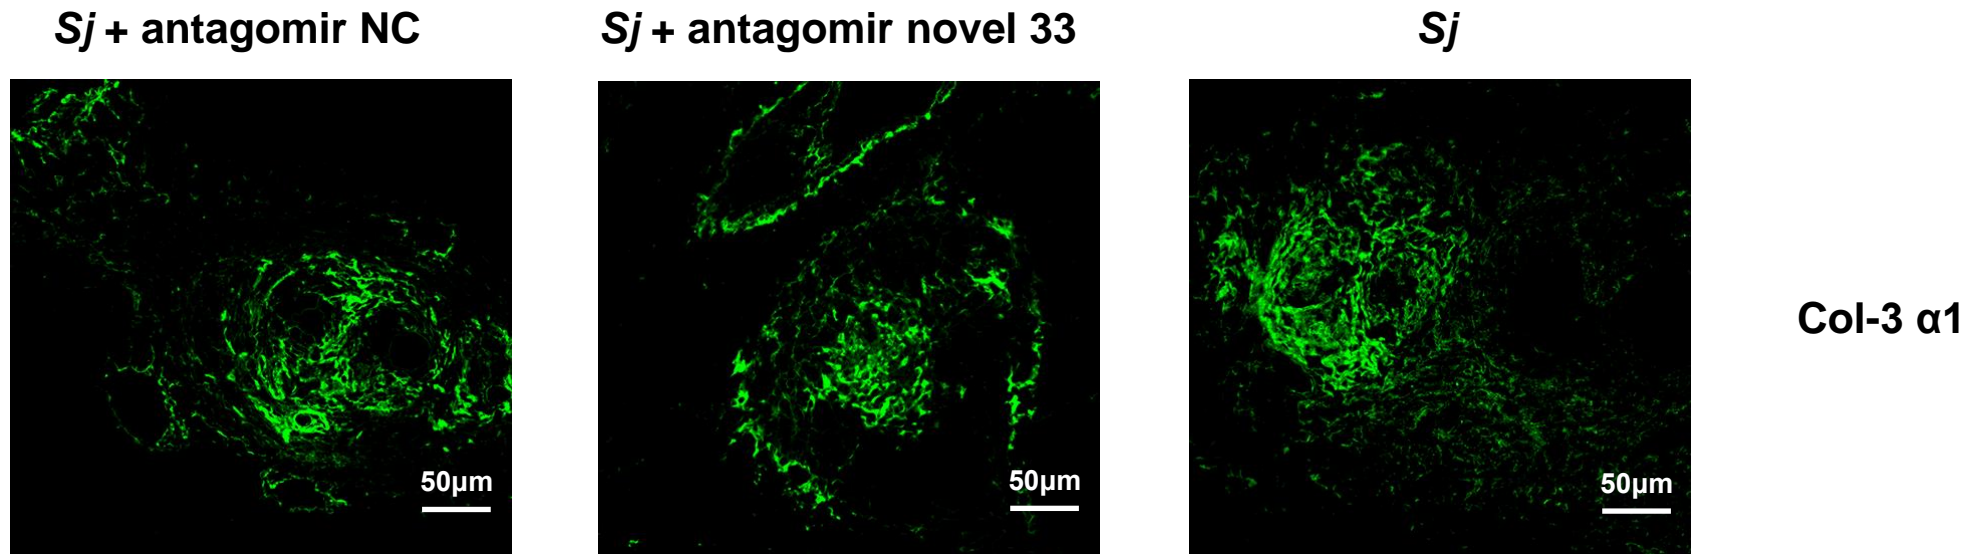

**Supplementary Figure S2. The expression of type III collagen did not change significantly after treatment with a novel miRNA-33 antagomir.** Six-week-old female C57BL/6 mice were percutaneously exposed to  $20 \pm 1$  *S. japonicum* cercariae, and 120  $\mu$ L of 20 nM miRNA antagomir NC(Ribo), miRNA antagomir novel 33 (Ribo), or normal saline were injected via the tail vein 7 days after mice were infected with *S. japonicum* cercariae, once a week for 6 weeks. The magnification of immunofluorescence image is 20  $\times$ .
